# Supplementary material for: Genetic platelet depletion is superior in platelet transfusion compared to current models
Source: PubMed Central journal article supplement — Haematologica. 2020 Nov 1;105(11):2698. doi: 10.3324/haematol.2020.266072 (PMC7604653; doi:10.3324/haematol.2020.266072), 2020-11-01
Supplement: 2020_266072-Disclosures_Contributions.pdf [file 2020_266072-Disclosures_Contributions.pdf]

Haematologica  
HAEMATOL/2020/266072  
Version 1

Genetic platelet depletion is superior in platelet transfusion compared to current models

Manuel Salzmann, Waltraud C Schrottmaier, Julia B Kral-Pointner, Marion Mussbacher, Julia Volz, Bastian Hoesel, Bernhard A Moser, Sonja Bleichert, Susanne Morava, Bernhard Nieswandt, Johannes A. Schmid, and Alice Assinger

Disclosures: None

Contributions: MS designed and carried out experiments, analysed data and wrote the manuscript interpreted experiments and contributed to the manuscript. WCS, JBK and MM carried out experiments and contributed to the manuscript. JV, BH, BM, SB and SM carried out experiments. BN interpreted experiments and contributed to the manuscript. JAS and AA supervised all research, designed and interpreted experiments and contributed to the manuscript.
